# Supplementary material for: Differential effects of Doxorubicin and Actinomycin D on the stability of RNA binding proteins, RBM10 and RBM5: Actinomycin D promotes the nuclear speckles targeting of RBM10 and RBM5 through the novel structural elements
Source: bioRxiv or medRxiv preprint supplement (doi:10.1101/627927), 2019-05-05

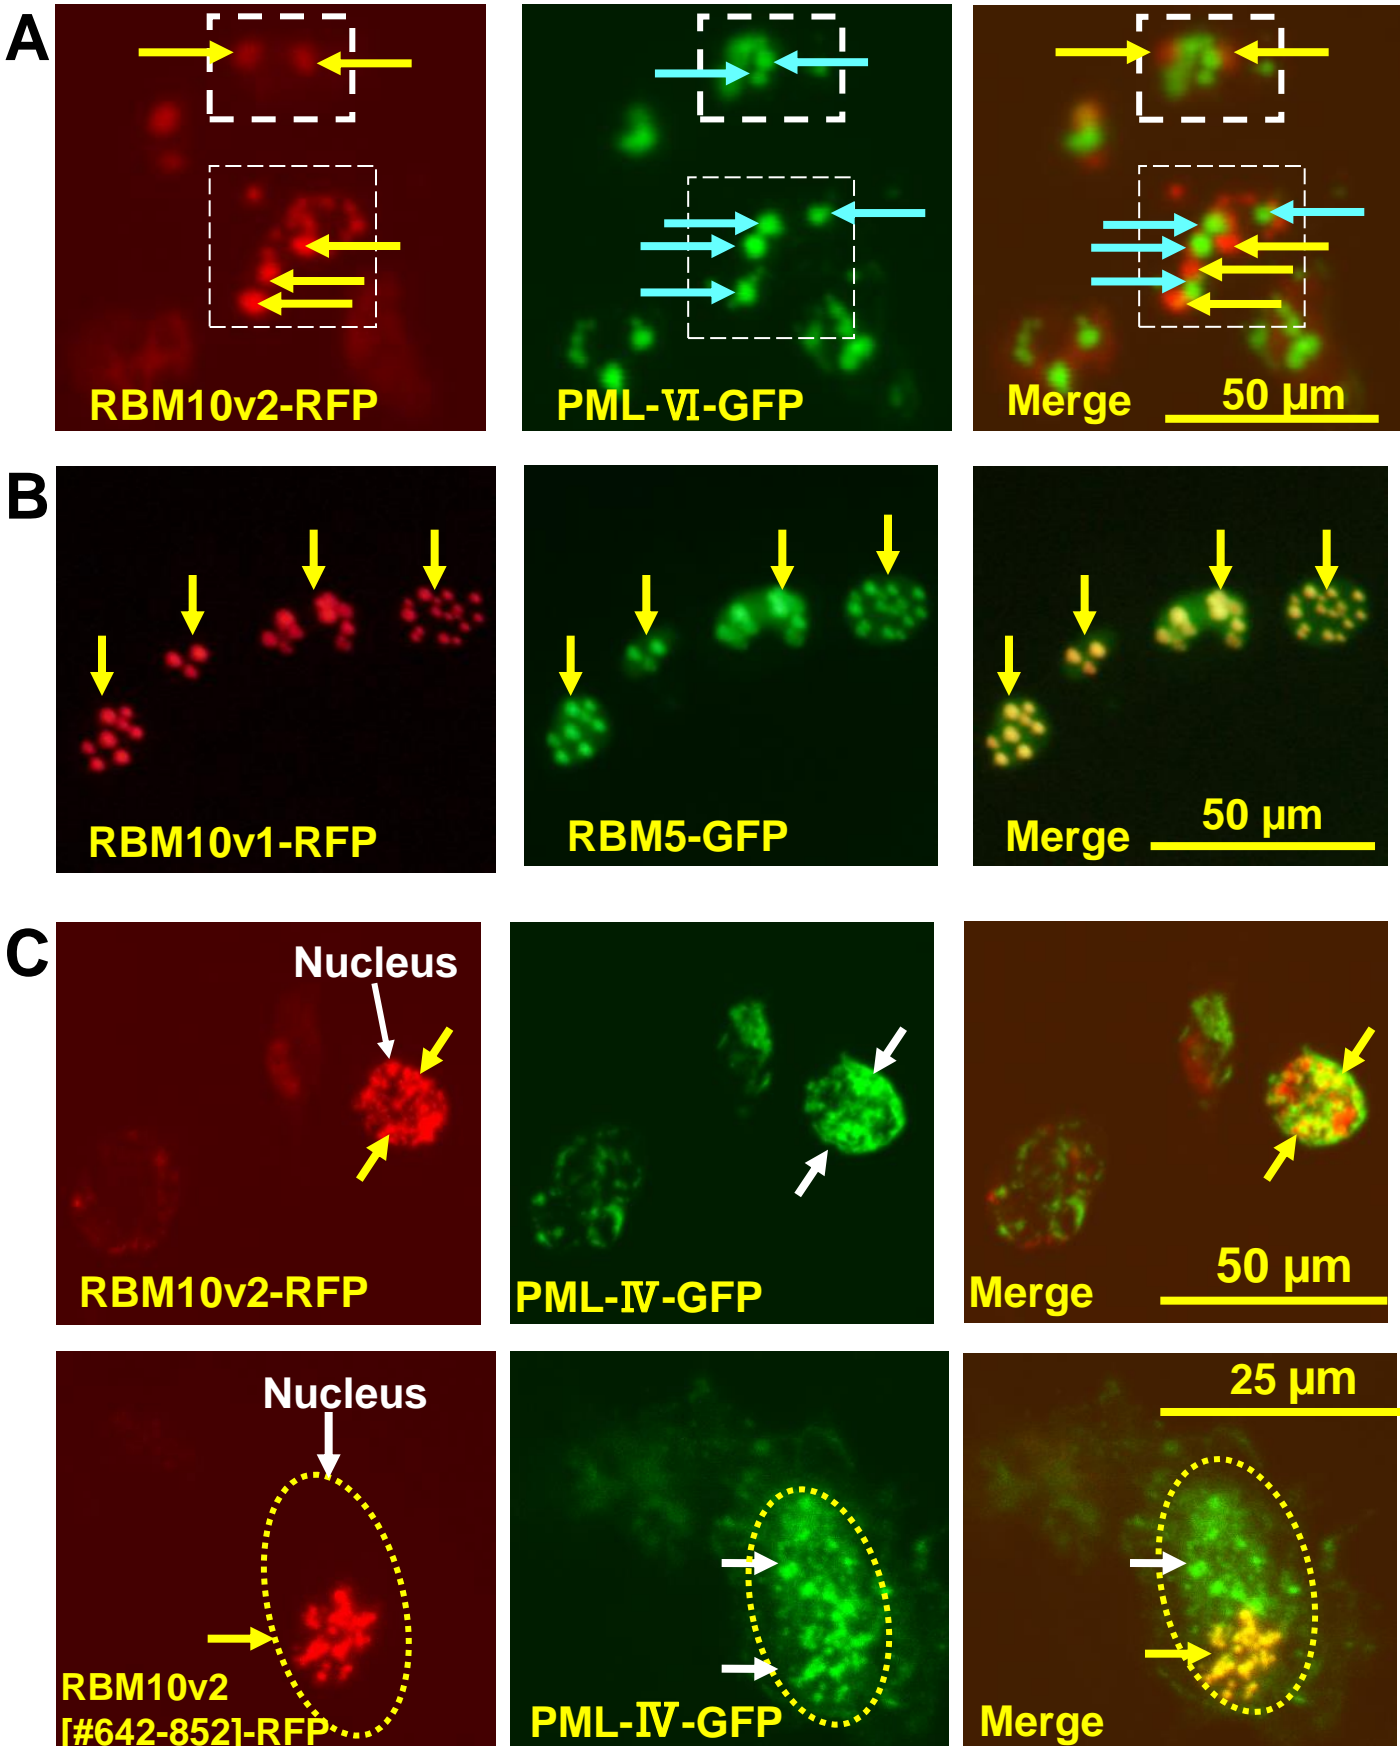

Supplement: Supplementary file [file media-3.pdf]
