# Supplementary material for: Differential effects of Doxorubicin and Actinomycin D on the stability of RNA binding proteins, RBM10 and RBM5: Actinomycin D promotes the nuclear speckles targeting of RBM10 and RBM5 through the novel structural elements
Source: bioRxiv or medRxiv preprint supplement (doi:10.1101/627927), 2019-05-05
Supplement: Supplementary file [file media-4.pdf]

Supplement Fig. S4

|                     |                     |                 |                          |                |                 |               |
|---------------------|---------------------|-----------------|--------------------------|----------------|-----------------|---------------|
|                     | 622                 | 630             | 640                      | 648            | 660             | 670           |
| human RBM10v2 (622) | KGALAERQHTSM        | DLPKLASD        | <b>DRPSPP</b>            | RGLVAA         | YSGESD          | SEEEQERGGPERE |
| human RBM10v1 (700) | KGALAERQHTSM        | DLPKLASD        | <b>DRPSPP</b>            | RGLVAA         | YSGESD          | SEEEQERGGPERE |
| human RBM5 (589)    | KGALAERQQLIPEL      | LVRNGDE         | <b>ENP-LK</b>            | RGLVAA         | YSGDSD          | NEEELVERLESEE |
|                     |                     |                 |                          |                |                 |               |
|                     | 673                 | 680             | 690                      | 700            | 710             | 720           |
| human RBM10v2 (673) | EKLTDWQK            | <b>LACLL</b>    | CRRQFPSKEALIRHQQLSGLHKQN | <b>LEIH</b>    | RRRAHLSENEL     |               |
| human RBM10v1 (751) | EKLTDWQK            | <b>LACLL</b>    | CRRQFPSKEALIRHQQLSGLHKQN | <b>LEIH</b>    | RRRAHLSENEL     |               |
| human RBM5 (639)    | EKLADWKK            | <b>MACLL</b>    | CRRQFPNKDALVRHQQLSDLHKQN | <b>MDIY</b>    | RRSRLSEQEL      |               |
|                     |                     |                 |                          |                |                 |               |
|                     | 724                 | 730             | 740                      | 750            | 759             | 770           |
| human RBM10v2 (724) | <b>EALE</b>         | KNDMEQMKYRDRAAE | RREKYGIPEPPEP            | <b>KRRK</b>    | YGGISTASVDFEQPT |               |
| human RBM10v1 (802) | <b>EALE</b>         | KNDMEQMKYRDRAAE | RREKYGIPEPPEP            | <b>KRRK</b>    | YGGISTASVDFEQPT |               |
| human RBM5 (690)    | <b>EALE</b>         | LRERE-MKYRDRAAE | RREKYGIPEPPEP            | <b>KRRK</b>    | Q--FDAGTVNIEQPT |               |
|                     |                     |                 |                          |                |                 |               |
|                     | 775                 | 780             | 790                      | 800            | 810             | 820           |
| human RBM10v2 (775) | RDGLGSDNIGSRMLQAMGW | KEGSGLGRKKQ     | <b>GI</b>                | <b>VTPIEAQ</b> | TRVRGSGLGAR     | G             |
| human RBM10v1 (853) | RDGLGSDNIGSRMLQAMGW | KEGSGLGRKKQ     | <b>GI</b>                | <b>VTPIEAQ</b> | TRVRGSGLGAR     | G             |
| human RBM5 (738)    | KDGI                | DHSNIGNKMLQAMGW | REGSGLGRKKQ              | <b>GI</b>      | <b>TAPIEAQ</b>  | VRLKGAGLGAK   |
|                     |                     |                 |                          |                |                 |               |
|                     | 826                 | 830             | 930                      | 852            |                 |               |
| human RBM10v2 (826) | SSYGVTSTESYK        | ETLHK           | TMVTRFNEAQ               |                |                 |               |
| human RBM10v1 (904) | SSYGVTSTESYK        | ETLHK           | TMVTRFNEAQ               |                |                 |               |
| human RBM5 (789)    | SAYGLSGADSYK        | DAVRK           | AMFARFTEME               |                |                 |               |
